# Supplementary material for: Fungal Community Composition at the Last Remaining Wild Site of Yellow Early Marsh Orchid (Dactylorhiza incarnata ssp. ochroleuca)
Source: MDPI journal article supplement (doi:10.3390/microorganisms11082124), 2023-08-21
Supplement: s1 [file s1]

**Table S1**

DNA yields from 20 soil samples collected from the wild site of *Dactylorhiza incarnata* ssp. *ochroleuca*

| Sample ID | DNA (ng/μl) | 260/280 | 260/230 |
|-----------|-------------|---------|---------|
| 1         | 84          | 1.8     | 1.5     |
| 2         | 70          | 1.9     | 1.4     |
| 3         | 78          | 1.9     | 1.1     |
| 4         | 90          | 1.8     | 1.4     |
| 5         | 99.1        | 1.61    | 0.95    |
| 6         | 48.8        | 1.87    | 2.01    |
| 7         | 87          | 1.7     | 1.3     |
| 8         | 103         | 1.9     | 1.6     |
| 9         | 42.1        | 1.94    | 0.83    |
| 10        | 164         | 1.8     | 1.4     |
| 11        | 57          | 1.9     | 1.5     |
| 12        | 95          | 1.9     | 1.5     |
| 13        | 140         | 1.8     | 1.1     |
| 14        | 118         | 1.8     | 1.3     |
| 15        | 76          | 1.8     | 1.5     |
| 16        | 82          | 1.8     | 1.5     |
| 17        | 104         | 1.8     | 1       |
| 18        | 104         | 1.8     | 1.8     |
| 19        | 71          | 1.8     | 1.5     |
| 20        | 91          | 1.7     | 1.2     |

Table S2. Metabarcoding results of soil samples of *Dactyloctenium aegyptium* ssp. *ochroleuca* collected from 20 sites showing community composition and relative abundance percentages.

[illegible]



[illegible]

**Table S3. Soil analysis results showing p values from Pearson Correlation analysis of all plots studied, orchid hosting plots, and non-orchid hosting plots**

[illegible]

## ORCHID PLOTS

[illegible]

## NON-ORCHID PLOTS ONLY

[illegible]
